# Supplementary material for: Icariin Improves Stress Resistance and Extends Lifespan in Caenorhabditis elegans through hsf-1 and daf-2-Driven Hormesis
Source: MDPI journal article supplement (doi:10.3390/ijms25010352), 2023-12-26
Supplement: s1 [file s1]

## Supplementary information

### **Icariin Improves Stress Resistance and Extends Lifespan in *Caenorhabditis elegans* Through *hsf-1* and *daf-2*-driven Hormesis**

Monika N. Todorova<sup>1</sup>, Martina S. Savova<sup>1,2</sup>, Liliya V. Mihaylova<sup>1,2</sup> and Milen I. Georgiev<sup>1,2,\*</sup>

1 Laboratory of Metabolomics, Institute of Microbiology, Bulgarian Academy of Sciences, 139 Ruski Blvd., 4000 Plovdiv, Bulgaria; mntodorova@yahoo.com; m.sav@abv.bg; liliya.vl.mihaylova@gmail.com; milengeorgiev@gbg.bg

2 Department of Plant Cell Biotechnology, Center of Plant Systems Biology and Biotechnology, 4000 Plovdiv, Bulgaria; m.sav@abv.bg; liliya.vl.mihaylova@gmail.com; milengeorgiev@gbg.bg

\* Correspondence: milengeorgiev@gbg.bg; Tel: 00359 32 64 24 30

## Supplementary Figures

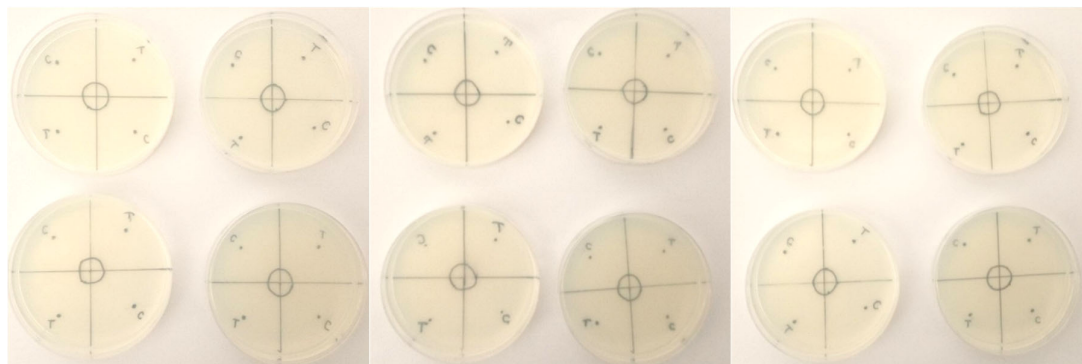

**Supplementary Figure S1.** Images of assaying plates used for chemotaxis evaluation.

## Supplementary Tables

**Supplementary Table S1.** Effect of icariin treatment (10, 50 and 100  $\mu$ M) on mean and maximum lifespan in days of wild-type and *daf-2* mutant *C. elegans*.

| Strain               | Treatment   | Mean lifespan (SEM) | Maximum lifespan (SEM) |
|----------------------|-------------|---------------------|------------------------|
| N2 (wild type)       | Vehicle     | 15.76 (0.23)        | 19.78 (0.28)           |
|                      | Icariin 10  | 22.17 (0.39)        | 27.78 (0.27)           |
|                      | Icariin 50  | 25.2 (0.61)         | 35.67 (0.33)           |
|                      | Icariin 100 | 24.83 (0.57)        | 32.75 (0.26)           |
| <i>daf-2</i> (e1370) | Vehicle     | 34 (0.86)           | 48.33 (0.41)           |
|                      | Icariin 10  | 35.1 (0.89)         | 48.44 (0.24)           |
|                      | Icariin 50  | 34.29 (0.84)        | 46.56 (0.24)           |
|                      | Icariin 100 | 36.33 (1)           | 50.56 (0.34)           |
